# Supplementary material for: Genome-Wide Computational Prediction and Analysis of Noncoding RNAs in Oleidesulfovibrio alaskensis G20
Source: MDPI journal article supplement (doi:10.3390/microorganisms12050960), 2024-05-10

Supplemental figures of ncRNA structures identified in the genome of OA G20.

Supplemental\_Figure\_S5: RNase P type (A: OA G20, B: Rfam reference structure), Hammerhead type II (C: OA G20, D: Rfam reference structure), tmRNA (E: OA G20, F: Rfam reference structure)

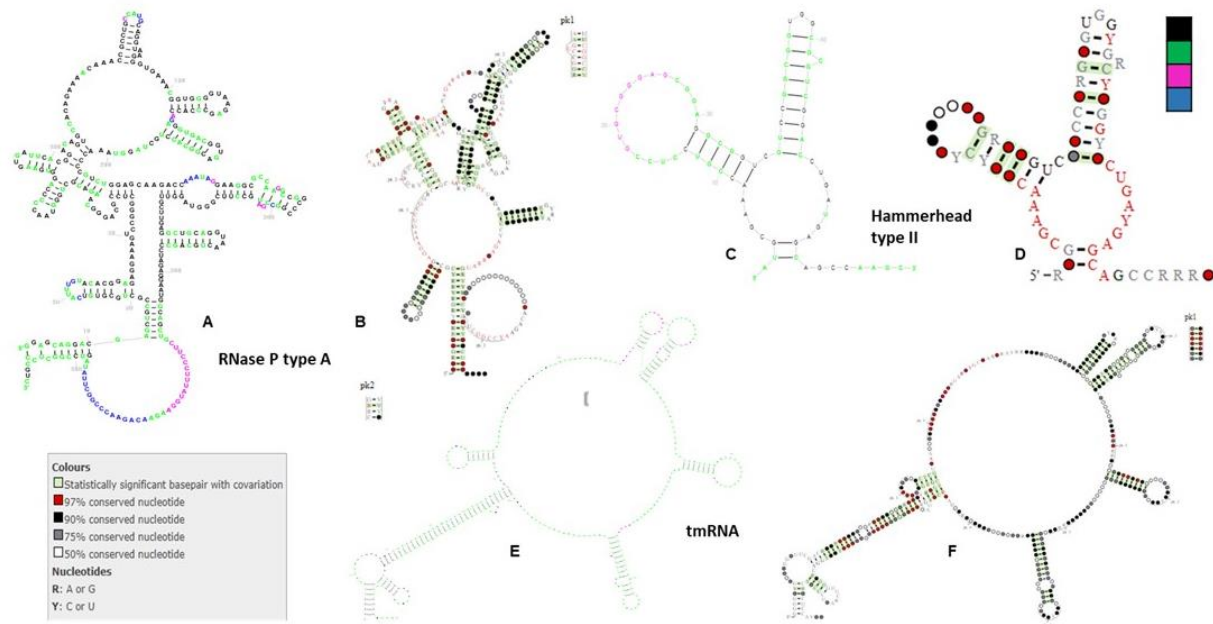

Supplement: s1 [file s1]
