# Supplementary material for: Genome-Wide Computational Prediction and Analysis of Noncoding RNAs in Oleidesulfovibrio alaskensis G20
Source: MDPI journal article supplement (doi:10.3390/microorganisms12050960), 2024-05-10

Supplemental figures of ncRNA structures identified in the genome of OA G20.

Supplemental\_Figure\_S1: TPP (2 identified structures A and B and C: Rfam reference structure) and Cobalamin (2 identified structures D and E and F: Rfam reference structure) Riboswitches.

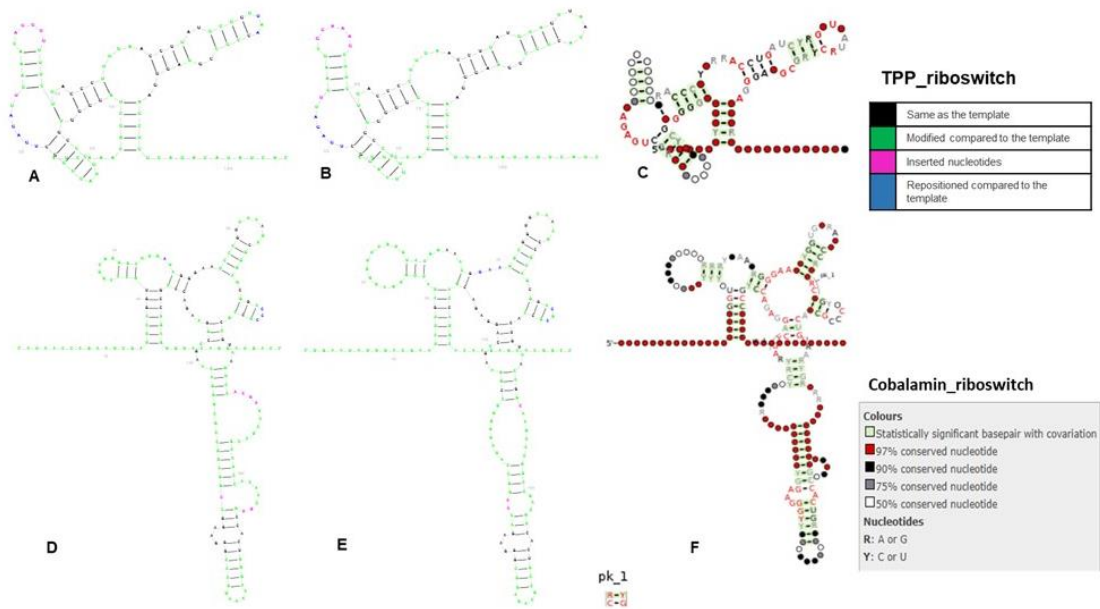

Supplement: s1 [file s1]
