# Supplementary material for: Genome-Wide Computational Prediction and Analysis of Noncoding RNAs in Oleidesulfovibrio alaskensis G20
Source: MDPI journal article supplement (doi:10.3390/microorganisms12050960), 2024-05-10

Supplemental figures of ncRNA structures identified in the genome of OA G20.

Supplemental\_Figure\_S4: sX4 sRNAs (A-G: OA G20, H: Rfam reference structure)

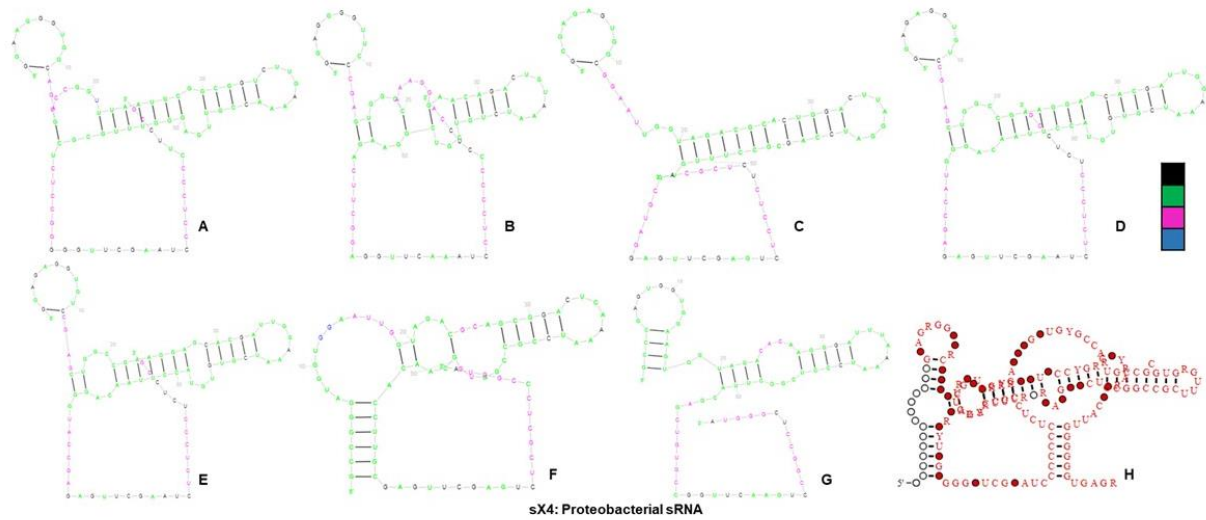

Supplement: s1 [file s1]
