# Supplementary material for: Genome-Wide Computational Prediction and Analysis of Noncoding RNAs in Oleidesulfovibrio alaskensis G20
Source: MDPI journal article supplement (doi:10.3390/microorganisms12050960), 2024-05-10

Supplemental figures of ncRNA structures identified in the genome of OA G20.

Supplemental\_Figure\_S3: 6S RNA (A: OA G20, B: Rfam reference structure), bacterial small SRP (C: OA G20, D: Rfam reference structure), Pseudomonas P10 (E & F: OA G20, G: Rfam reference structure) and STnc490 (H: OA G20, I: Rfam reference structure)

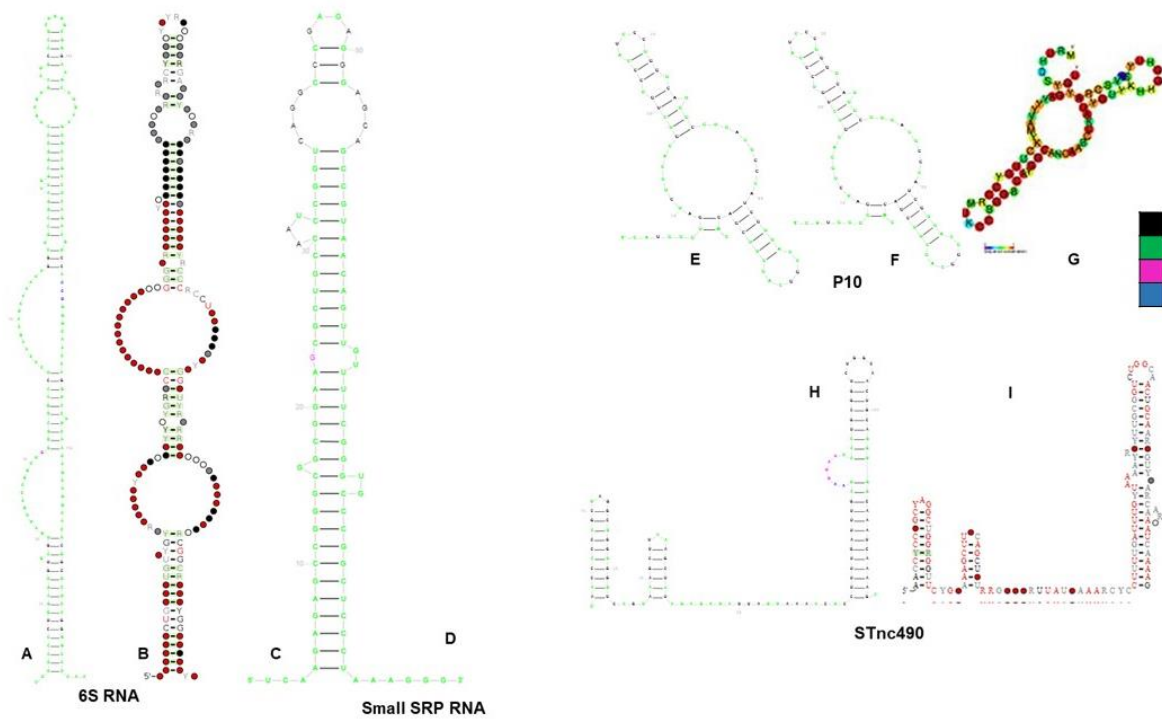

Supplement: s1 [file s1]
