# Supplementary material for: Genome-Wide Computational Prediction and Analysis of Noncoding RNAs in Oleidesulfovibrio alaskensis G20
Source: MDPI journal article supplement (doi:10.3390/microorganisms12050960), 2024-05-10
Supplement: s1 [file s1]

Supplemental Table S2: ncRNAs identified in OA G20 genome using approach 3

| ncRNAs Family          | Rfam ID  | Gene type           | Length | Genome location       | Strand | Description                                 |
|------------------------|----------|---------------------|--------|-----------------------|--------|---------------------------------------------|
| 5S_rRNA                | RF00001  | rrf                 | 115    | 3533731 : 3533617     | -      | 5S ribosomal RNA                            |
| 5S_rRNA                | RF00001  | rrf                 | 115    | 2604159 : 2604045     | -      | 5S ribosomal RNA                            |
| 5S_rRNA                | RF00001  | rrf                 | 115    | 1314473 : 1314587     | +      | 5S ribosomal RNA                            |
| 5S_rRNA                | RF00001  | rrf                 | 115    | 74882 : 74996         | +      | 5S ribosomal RNA                            |
| Glycine_riboswitch     | RF00504  | Cis-reg; riboswitch | 110    | 2838359 : 2838468     | +      | Glycine riboswitch                          |
| TPP_riboswitch         | RF00059  | Cis-reg; riboswitch | 104    | 1,573,919 : 1,574,022 | +      | TPP riboswitch (THI element)                |
| TPP_riboswitch         | RF00059  | Cis-reg; riboswitch | 107    | 1,574,080 : 1,574,186 | +      | TPP riboswitch (THI element)                |
| FMN_riboswitch         | RF00050  | Cis-reg; riboswitch | 164    | 1,078,058 : 1,078,221 | +      | FMN riboswitch                              |
| c-di-GMP-I             | RF01051  | Cis-reg; riboswitch | 70     | 841,128 : 841,197     | +      | Cyclic di-GMP-I riboswitch                  |
| Cobalamin_riboswitch   | RF00174  | Cis-reg; riboswitch | 183    | 3,093,545 : 3,093,727 | +      | Cobalamin riboswitch                        |
| Cobalamin_riboswitch   | RF00174  | Cis-reg; riboswitch | 180    | 2,347,981 : 2,347,802 | -      | Cobalamin riboswitch                        |
| SAM-riboswitch class I | RF00162  | Cis-reg; riboswitch | 108    | 2,490,976 : 2,491,083 | +      | SAM riboswitch (S box leader)               |
| Bacterial small_SRP    | RF00169  | ffs                 | 96     | 1,028,491 : 1,028,396 | -      | Small signal recognition particle RNA (SRP) |
| 6S                     | RF000013 | SsrS_RNA            | 179    | 1,007,678 : 1,007,500 | -      | 6S RNA                                      |
| SSU_rRNA_bacteria      | RF0177   | rRNA                | 1542   | 2,609,189 : 2,607,648 | -      | Bacterial small subunit ribosomal RNA       |
| SSU_rRNA_bacteria      | RF0177   | rRNA                | 1542   | 1,309,443 : 1,310,984 | +      | Bacterial small subunit ribosomal RNA       |
| SSU_rRNA_bacteria      | RF0177   | rRNA                | 1542   | 3,538,761 : 3,537,220 | -      | Bacterial small subunit ribosomal RNA       |
| SSU_rRNA_bacteria      | RF0177   | rRNA                | 1542   | 69,852 : 71,393       | +      | Bacterial small subunit ribosomal RNA       |
| LSU_rRNA_bacteria      | RF02541  | rRNA                | 2931   | 2,607,209 : 2,604,279 | -      | Bacterial large subunit ribosomal RNA       |
| LSU_rRNA_bacteria      | RF02541  | rRNA                | 2931   | 3,536,781 : 3,533,851 | -      | Bacterial large subunit ribosomal RNA       |
| LSU_rRNA_bacteria      | RF02541  | rRNA                | 2932   | 71,832 : 74,762       | +      | Bacterial large subunit ribosomal RNA       |
| LSU_rRNA_bacteria      | RF02541  | rRNA                | 2932   | 1,311,423 : 1,314,353 | +      | Bacterial large subunit ribosomal RNA       |
| tRNA_Sec               | RF01852  | tRNA                | 90     | 1,531,711 : 1,531,804 | -      | tRNA-Sec                                    |
| tRNA                   | RF00005  | tRNA                | 73     | 2,047,102 : 2,047,175 | +      | tRNA                                        |
| rnP                    | RF00010  | rnP                 | 361    | 1,785,161 : 1,785,521 | -      | Bacterial RNase P class A                   |
| hammerhead             | RF02276  | DDE_RS18215         | 76     | 3,331,688 : 3,331,763 | +      | Hammerhead ribozyme (type II)               |
| tmRNA                  | RF00023  | SsrA                | 360    | 1,988,131 : 1,988,490 | -      | tmRNA                                       |
