# Supplementary material for: Genome-Wide Computational Prediction and Analysis of Noncoding RNAs in Oleidesulfovibrio alaskensis G20
Source: Microorganisms. 2024 May 10;12(5):960. doi: 10.3390/microorganisms12050960 (PMC11124144; doi:10.3390/microorganisms12050960)
Supplement: Supplementary file 1 [file microorganisms-12-00960-s001.zip]

Archive with 8 entries (8 files):
- Supplemental Figure S1.pdf
- Supplemental Figure S2.pdf
- Supplemental Figure S3.pdf
- Supplemental Figure S4.pdf
- Supplemental Figure S5.pdf
- Supplemental Table S1.xlsx
- Supplemental Table S2.pdf
- Supplemental Table S3.pdf
