# Supplementary material for: Genome-Wide Computational Prediction and Analysis of Noncoding RNAs in Oleidesulfovibrio alaskensis G20
Source: Microorganisms. 2024 May 10;12(5):960. doi: 10.3390/microorganisms12050960 (PMC11124144; doi:10.3390/microorganisms12050960)
Supplement: Supplementary file 1 [file microorganisms-12-00960-s001.zip › Supplemental Table S1.xlsx]

## Sheet: rfam_results
#target name accession query name accession mdl mdl from mdl to seq from seq to strand trunc pass gc bias score E-value inc description of target
#------------------- --------- -------------------- --------- --- -------- -------- -------- -------- ------ ----- ---- ---- ----- ------ --------- --- ---------------------
tRNA-Sec RF01852 outRoot218 - cm 1 91 6022 5933 - no 1 0.61 0.0 84.5 5.2e-17 ! Selenocysteine transfer RNA
tRNA RF00005 outRoot218 - cm 1 71 6021 5933 - no 1 0.61 0.0 36.6 4.1e-05 ! tRNA
TPP RF00059 outRoot224 - cm 1 105 6143 6246 + no 1 0.55 0.0 74.8 7e-14 ! TPP riboswitch (THI element)
TPP RF00059 outRoot224 - cm 1 105 6304 6410 + no 1 0.53 0.0 68.7 2.2e-12 ! TPP riboswitch (THI element)
tRNA RF00005 outRoot227 - cm 1 71 5879 5805 - no 1 0.60 0.0 64.9 4.7e-13 ! tRNA
tRNA RF00005 outRoot232 - cm 1 71 2788 2861 + no 1 0.64 0.0 61.3 4.9e-12 ! tRNA
tRNA RF00005 outRoot246 - cm 1 71 454 381 - no 1 0.68 0.0 61.8 3.7e-12 ! tRNA
SAM RF00162 outRoot355 - cm 1 108 6331 6438 + no 1 0.64 0.0 76.8 3e-17 ! SAM riboswitch (S box leader)
tRNA RF00005 outRoot358 - cm 1 71 3758 3841 + no 1 0.61 0.0 55.0 2.8e-10 ! tRNA
LSU_rRNA_bacteria RF02541 outRoot372 - cm 1 2925 3581 651 - no 1 0.53 34.6 3000.7 0 ! Bacterial large subunit ribosomal RNA
LSU_rRNA_archaea RF02540 outRoot372 - cm 1 2987 3582 652 - no 1 0.53 34.6 2010.6 0 ! Archaeal large subunit ribosomal RNA
SSU_rRNA_bacteria RF00177 outRoot372 - cm 1 1533 5561 4020 - no 1 0.56 18.7 1591.4 0 ! Bacterial small subunit ribosomal RNA
LSU_rRNA_eukarya RF02543 outRoot372 - cm 1 3401 3418 664 - no 1 0.54 32.3 1311.3 0 ! Eukaryotic large subunit ribosomal RNA
SSU_rRNA_archaea RF01959 outRoot372 - cm 1 1477 5556 4022 - no 1 0.56 20.3 1067.9 0 ! Archaeal small subunit ribosomal RNA
SSU_rRNA_microsporidia RF02542 outRoot372 - cm 1 1311 5556 4025 - no 1 0.56 20.7 738.6 7e-226 ! Microsporidia small subunit ribosomal RNA
SSU_rRNA_eukarya RF01960 outRoot372 - cm 1 1831 5556 4025 - no 1 0.56 20.7 700.3 3.5e-210 ! Eukaryotic small subunit ribosomal RNA
5S_rRNA RF00001 outRoot372 - cm 1 119 531 417 - no 1 0.58 0.0 84.6 4.6e-17 ! 5S ribosomal RNA
tRNA RF00005 outRoot372 - cm 1 71 3953 3880 - no 1 0.57 0.0 72.9 2.7e-15 ! tRNA
tRNA RF00005 outRoot372 - cm 1 71 3862 3790 - no 1 0.63 0.0 65.0 4.5e-13 ! tRNA
tRNA RF00005 outRoot379 - cm 1 71 4688 4617 - no 1 0.61 0.0 58.2 3.6e-11 ! tRNA
Glycine RF00504 outRoot405 - cm 1 94 3764 3873 + no 1 0.59 0.0 68.8 2.8e-13 ! Glycine riboswitch
tRNA RF00005 outRoot407 - cm 7 64 2945 2875 - no 1 0.54 0.0 29.4 0.0041 ! tRNA
tRNA RF00005 outRoot415 - cm 1 71 3901 3813 - no 1 0.61 0.0 63.2 1.5e-12 ! tRNA
tRNA RF00005 outRoot424 - cm 1 71 1776 1849 + no 1 0.55 0.0 68.9 3.6e-14 ! tRNA
tRNA RF00005 outRoot424 - cm 1 71 1889 1961 + no 1 0.58 0.0 68.0 6.5e-14 ! tRNA
tRNA RF00005 outRoot424 - cm 1 71 1638 1720 + no 1 0.57 0.0 62.6 2.2e-12 ! tRNA
tRNA RF00005 outRoot424 - cm 1 71 3377 3450 + no 1 0.62 0.0 62.3 2.5e-12 ! tRNA
tRNA RF00005 outRoot424 - cm 1 71 1557 1629 + no 1 0.59 0.0 61.6 4.1e-12 ! tRNA
tRNA RF00005 outRoot430 - cm 1 71 2627 2554 - no 1 0.68 0.0 72.7 3.1e-15 ! tRNA
tRNA RF00005 outRoot430 - cm 1 71 2708 2636 - no 1 0.60 0.0 67.6 8.6e-14 ! tRNA
tRNA RF00005 outRoot432 - cm 1 71 1810 1737 - no 1 0.68 0.0 72.7 3.1e-15 ! tRNA
tRNA RF00005 outRoot435 - cm 1 71 3911 3838 - no 1 0.61 0.0 69.9 2e-14 ! tRNA
Cobalamin RF00174 outRoot442 - cm 15 189 1 168 + 5' 2 0.62 0.0 102.1 1.1e-26 ! Cobalamin riboswitch
tRNA RF00005 outRoot446 - cm 1 71 6505 6579 + no 1 0.63 0.0 58.3 3.3e-11 ! tRNA
#
# Program: cmscan
# Version: 1.1.2 (July 2016)
# Pipeline mode: SCAN
# Query file: infernal_cmscan-R20230109-230649-0064-11203432-p2m.sequence
# Target file: /nfs/public/ro/es_codon/newdata/prod/flatfiles/rfam/rfam
# Option settings: /nfs/public/ro/es_codon/appbin/linux-x86_64/infernal-1.1.2/bin/cmscan --tblout infernal_cmscan-R20230109-230649-0064-11203432-p2m.tblout --notextw --cut_ga --FZ 5 --nohmmonly --cpu 4 /nfs/public/ro/es_codon/newdata/prod/flatfiles/rfam/rfam infernal_cmscan-R20230109-230649-0064-11203432-p2m.sequence
# Current dir: /nfs/public/rw/es/projects/wp-jdispatcher/logs/prod/sources/jobs/infernal_cmscan/rest/20230109/2306
# Date: Mon Jan 9 23:19:32 2023
# [ok]
